# Supplementary material for: Bayesian spatial modelling of malaria burden in two contrasted eco-epidemiological facies in Benin (West Africa): call for localized interventions
Source: Springer Nature journal article supplement (doi:10.1186/s12889-022-14032-9), 2022-09-16
Supplement: MOESM1 [file 23504598]

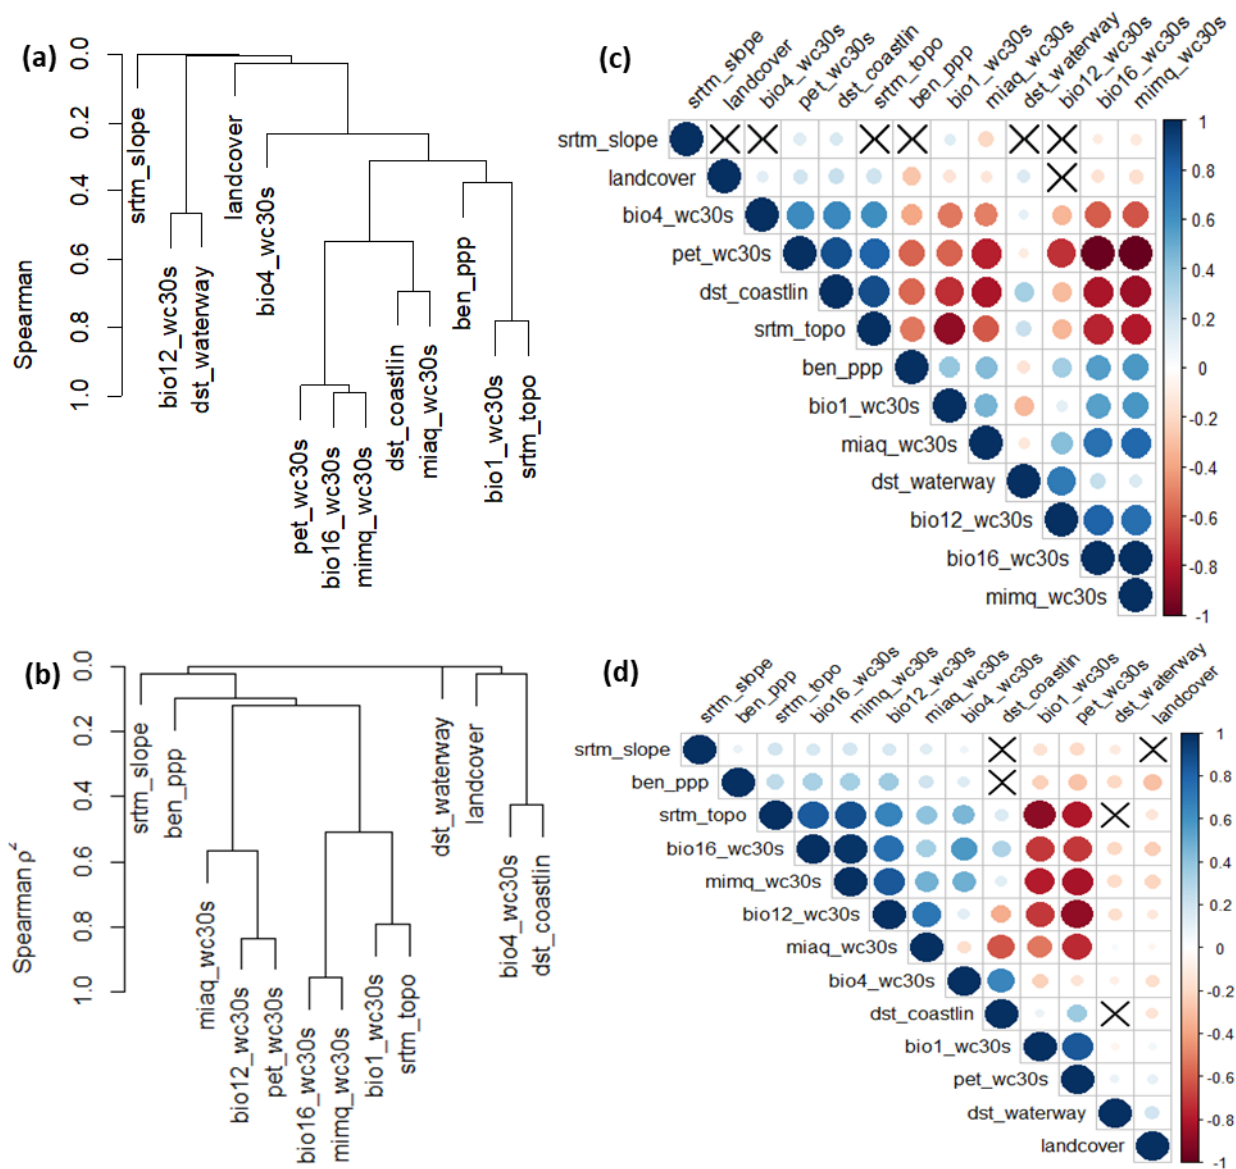

**Figure A1.** Correlation between preselected covariates (c & d) and their similarity groups (a & b) for the OKT region (top panel) and DCO region (bottom panel) – Cells with crosses are correlation coefficients that are not statistically significant
