# Supplementary material for: Bayesian spatial modelling of malaria burden in two contrasted eco-epidemiological facies in Benin (West Africa): call for localized interventions
Source: Springer Nature journal article supplement (doi:10.1186/s12889-022-14032-9), 2022-09-16
Supplement: MOESM2 [file 23504598]

**Table A1:** Simple binomial GLM fitted to the OKT data

| Source of variation            | Estimate | Std. Error | z value | Pr(> z ) |
|--------------------------------|----------|------------|---------|----------|
| <b>Prevalence of infection</b> |          |            |         |          |
| (Intercept)                    | -0.603   | 0.033      | -18.303 | < 2e-16  |
| ben_ppp                        | 0.117    | 0.052      | 2.267   | 0.023    |
| bio1_wc30s                     | 0.188    | 0.110      | 1.706   | 0.088    |
| bio12_wc30s                    | -5.017   | 0.740      | -6.781  | < 0.001  |
| bio16_wc30s                    | -3.347   | 1.210      | -2.765  | 0.006    |
| bio4_wc30s                     | -0.117   | 0.069      | -1.697  | 0.090    |
| dst_coastlin                   | 5.156    | 0.710      | 7.260   | < 0.001  |
| landcover                      | 0.202    | 0.039      | 5.214   | < 0.001  |
| miaq_wc30s                     | -0.266   | 0.086      | -3.090  | 0.002    |
| mimq_wc30s                     | 10.874   | 1.267      | 8.584   | < 0.001  |
| pet_wc30s                      | -1.407   | 0.596      | -2.361  | 0.018    |
| srtm_topo                      | 1.011    | 0.149      | 6.792   | 0.000    |
| <b>Prevalence of cases</b>     |          |            |         |          |
| (Intercept)                    | -1.637   | 0.042      | -38.689 | < 0.001  |
| ben_ppp                        | 0.158    | 0.063      | 2.522   | 0.012    |
| bio12_wc30s                    | -2.171   | 0.633      | -3.433  | 0.001    |
| bio4_wc30s                     | -0.201   | 0.071      | -2.826  | 0.005    |
| dst_coastlin                   | 2.160    | 0.626      | 3.450   | 0.001    |
| landcover                      | 0.096    | 0.051      | 1.889   | 0.059    |
| miaq_wc30s                     | -0.342   | 0.093      | -3.688  | < 0.001  |
| mimq_wc30s                     | 3.982    | 1.029      | 3.868   | < 0.001  |
| srtm_slope                     | 0.083    | 0.050      | 1.665   | 0.096    |
| srtm_topo                      | 0.564    | 0.106      | 5.326   | < 0.001  |

The table A1 showed the estimates of the binomial GLM fitted to the data from the OKT (Ouidah – Kpomassè – Tori) health district, where only covariates having a significant effect on *P. Falciparum* infection at 10% have been presented. Annual rainfall (bio12\_wc30s), rainfall of wettest quarter (bio16\_wc30s), evapotranspiration (pet\_wc30s), and moisture index of arid quarter (miaq\_wc30s) have a negative effect with malaria infection, while population density (ben\_ppp), distance to coastline (dst\_coastlin), topography (srtm\_topo), moisture index of moist quarter (mimq\_wc30s) and land cover have a positive effect. Regarding the malaria clinical cases, annual rainfall, temperature seasonality, and moisture index of arid quarter showed a negative link with the observed response, while population density, distance to coastline, topography and moisture index of moist quarter revealed a positive link.
