# Supplementary material for: Bayesian spatial modelling of malaria burden in two contrasted eco-epidemiological facies in Benin (West Africa): call for localized interventions
Source: Springer Nature journal article supplement (doi:10.1186/s12889-022-14032-9), 2022-09-16
Supplement: MOESM3 [file 23504598]

**Table A2:** Simple binomial GLM fitted to the DCO data

| Source of variation            | Estimate | Std. Error | z value | Pr(> z ) |
|--------------------------------|----------|------------|---------|----------|
| <b>Prevalence of infection</b> |          |            |         |          |
| (Intercept)                    | 1.082    | 0.032      | 33.335  | < 2e-16  |
| ben_ppp                        | -0.370   | 0.056      | -6.664  | 2.66E-11 |
| bio12_wc30s                    | 0.553    | 0.207      | 2.669   | 0.008    |
| bio16_wc30s                    | -0.775   | 0.263      | -2.949  | 0.003    |
| dst_coastlin                   | 0.516    | 0.163      | 3.178   | 0.001    |
| dst_waterway                   | 0.167    | 0.058      | 2.863   | 0.004    |
| landcover                      | -0.058   | 0.041      | -1.394  | 0.163    |
| pet_wc30s                      | -0.313   | 0.115      | -2.711  | 0.007    |
| srtm_slope                     | 0.093    | 0.038      | 2.470   | 0.014    |
| <b>Prevalence of cases</b>     |          |            |         |          |
| (Intercept)                    | -0.759   | 0.030      | -25.153 | < 2e-16  |
| ben_ppp                        | -0.093   | 0.042      | -2.197  | 0.028    |
| bio12_wc30s                    | 0.469    | 0.107      | 4.399   | 1.09E-05 |
| bio4_wc30s                     | 0.217    | 0.049      | 4.382   | 1.18E-05 |
| dst_waterway                   | 0.214    | 0.061      | 3.490   | 0.000    |
| landcover                      | 0.131    | 0.041      | 3.220   | 0.001    |
| miaq_wc30s                     | -0.091   | 0.047      | -1.934  | 0.053    |
| mimq_wc30s                     | -0.331   | 0.102      | -3.255  | 0.001    |
| pet_wc30s                      | 0.211    | 0.106      | 1.998   | 0.046    |
| srtm_slope                     | -0.061   | 0.037      | -1.649  | 0.099    |
| srtm_topo                      | 0.281    | 0.094      | 2.986   | 0.003    |

The table A2 showed the estimates of the binomial GLM fitted to the data from the DCO (Djougou – Copargo – Ouaké) health district, where only exposures having a significant effect on *P. Falciparum* infection at 10% have been presented. Population density, rainfall of wettest quarter and evapotranspiration are negatively linked to malaria infection while annual rainfall, distances to coastlines and waterways and slope are positively linked to malaria infection. For the malaria clinical cases, population density, moisture index of arid quarter, moisture index of moist quarter and slope showed a negative relationship with the observed response, while annual rainfall, temperature seasonality, distances to waterways, land cover, evapotranspiration and topography depicted a positive link with the observed outcome.
