# Supplementary material for: Bayesian spatial modelling of malaria burden in two contrasted eco-epidemiological facies in Benin (West Africa): call for localized interventions
Source: Springer Nature journal article supplement (doi:10.1186/s12889-022-14032-9), 2022-09-16
Supplement: MOESM4 [file 23504598]

**Table A3:** Bayesian binomial model with random noises fitted to the OKT data

| Sources of variation           | Mean     | SD        | 2.5%    | 50%     | 97.5%     |
|--------------------------------|----------|-----------|---------|---------|-----------|
| <b>Prevalence of infection</b> |          |           |         |         |           |
| (Intercept)                    | -0.654   | 0.130     | -0.913  | -0.654  | -0.398    |
| ben_ppp                        | 0.154    | 0.208     | -0.257  | 0.153   | 0.567     |
| bio12_wc30s                    | -5.812   | 2.761     | -11.292 | -5.810  | -0.354    |
| bio16_wc30s                    | -2.398   | 4.760     | -11.788 | -2.413  | 7.063     |
| bio4_wc30s                     | -0.214   | 0.262     | -0.734  | -0.213  | 0.302     |
| dst_coastlin                   | 5.921    | 2.677     | 0.620   | 5.919   | 11.225    |
| landcover                      | 0.211    | 0.156     | -0.098  | 0.211   | 0.520     |
| miaq_wc30s                     | -0.306   | 0.356     | -1.013  | -0.305  | 0.397     |
| mimq_wc30s                     | 11.301   | 4.898     | 1.561   | 11.312  | 20.970    |
| pet_wc30s                      | -1.232   | 2.196     | -5.583  | -1.233  | 3.117     |
| srtm_topo                      | 0.840    | 0.313     | 0.221   | 0.840   | 1.462     |
| Precision $\tau_v$             | 2.310    | 0.791     | 1.074   | 2.205   | 4.143     |
| <b>Prevalence of cases</b>     |          |           |         |         |           |
| (Intercept)                    | -1.650   | 0.054     | -1.764  | -1.648  | -1.548    |
| ben_ppp                        | 0.165    | 0.081     | 0.008   | 0.164   | 0.333     |
| bio12_wc30s                    | -2.132   | 0.791     | -3.691  | -2.138  | -0.533    |
| bio4_wc30s                     | -0.205   | 0.091     | -0.392  | -0.203  | -0.026    |
| dst_coastlin                   | 2.131    | 0.784     | 0.556   | 2.134   | 3.683     |
| landcover                      | 0.102    | 0.067     | -0.026  | 0.101   | 0.241     |
| miaq_wc30s                     | -0.357   | 0.119     | -0.606  | -0.354  | -0.129    |
| mimq_wc30s                     | 3.927    | 1.293     | 1.318   | 3.935   | 6.479     |
| srtm_slope                     | 0.085    | 0.064     | -0.042  | 0.085   | 0.214     |
| srtm_topo                      | 0.563    | 0.131     | 0.303   | 0.563   | 0.822     |
| Precision $\tau_v$             | 9714.100 | 17023.120 | 6.699   | 322.760 | 59127.390 |

Table A3 showed the estimates of the effects of malaria exposures in the OKT health district using Bayesian GLMM (generalized linear mixed models) without spatial component. Only annual rainfall showed a significant negative link with the risk of infection by *P. falciparum* when including village-specific random effects in the model. In contrarily, distance to coastline, moisture index of moist quarter and topography revealed a significant positive link with malaria infection. Regarding the malaria clinical cases, the trends of exposures are exactly similar to those observed with frequentist GLMs in Table A1. However, there is a low variability within the observed malaria clinical cases (high precision) as compared to malaria infection outcomes.
